# Supplementary material
Source: Research Square preprint supplement (doi:10.21203/rs.3.rs-9542089/v1)
Supplement: Supplementary file 1 [file 802b8a2b88e2b2f61117e60f.docx]

**DISRUPTED MATRESCENCE: A qualitative systematic review and meta-ethnography exploring the impact of flooding disasters during pregnancy. Maternal and Child Health journal. Mason-Jones AJ, Babasola D, Dinam-Badzi C, Afumaa E, Mroz E, Adjorlolo S. Corresponding author: amanda.mason-jones@york.ac.uk**

**Online Resource 1: Search Strategies for all databases**

| **African Index Medicus via Global Index Medicus hosted by WHO**  tw:((tw:(pregnan*))) AND ( mj:("Pregnant People" OR "Pregnancy" OR "Prenatal Care" OR "Pregnancy in Adolescence" OR "Maternal Mortality" OR "Pregnancy Complications" OR "Maternal Health Services" OR "Obstetrics") AND type_of_study:("qualitative_research")) AND (year_cluster:[2016 TO 2026])  Flood not put in as a search term. All abstracts search for flood-related references. |
| --- |
| **African journals online (AJOL)**  “Pregnancy and flooding and qualitative” |
| **ASSIA (ProQuest)**  flood OR floodplains AND MAINSUBJECT.EXACT.EXPLODE("Pregnant women") OR (MAINSUBJECT.EXACT.EXPLODE("Pregnancy") OR MAINSUBJECT.EXACT.EXPLODE("Unplanned pregnancy") OR MAINSUBJECT.EXACT.EXPLODE("Unwanted pregnancy")) AND (MAINSUBJECT.EXACT.EXPLODE("Qualitative data") OR MAINSUBJECT.EXACT.EXPLODE("Qualitative research")) |
| **CINAHL (complete)**  ( flooding or flood or floods or rain or "tidal waves" or deluge or "flash flood" or "flood plain" or "seasonal flood" or "flood event"  ) AND ( pregnancy.mp or pregnant or prenatal or antenatal or perinatal or maternal or Pregnancy Trimester, First/ or Pregnancy Trimesters/ or Pregnancy/ or Pregnancy Trimester, Third/ or pregnancy.mp. or Pregnancy Trimester, Second/ or "first 1000 days" or maternal health services/ or maternal-child health services/ or perinatal care/ or prenatal care/ or pregnancy/ or labor, obstetric/ or pregnancy maintenance/ or "antenatal care"  ) AND ( qualitative research or qualitative study or qualitative methods or interview ) |
| **Embase (Ovid) (1974 to Feb 2026)**  exp *disaster/ or exp *flooding/ or exp *river/ or exp *flood tide/and pregnant.mp. or exp *pregnant woman/ or exp *pregnant person/pregnancy outcome/ or pregnancy disorder/ or third trimester pregnancy/ or pregnancy complication/ or attitude to pregnancy/ or high risk pregnancy/ or unplanned pregnancy/ or early pregnancy factor/ or adolescent pregnancy/ or pregnancy termination/ or pregnancy.mp. or pregnancy/ or pregnancy-related mortality/ or second trimester pregnancy/ or prolonged pregnancy/health care access/ or health care access.mp./health care utilization/ or health care utilisation.mp./health care access.mp. or health care access/primary health care.mp. or primary health care/community health services.mp. or community care/secondary healthcare.mp. or secondary health care/qualitative analysis/ or qualitative research/ or qualitative.mp. or interview/ or semi structured interview/ or qualitative interview.mp. / or qualitative research/ or focus groups.mp. |
| **MEDLINE(R) (Ovid) 1946 to Feb 2026**  flood*.mp. or Floods/ and Pregnancy Complications/ or Pregnancy Trimester, First/ or Pregnancy Trimesters/ or Pregnancy/ or pregnancy.mp. or Pregnancy, Unwanted/ or Pregnancy Trimester, Third/ or Pregnancy in Adolescence/ or Pregnancy Trimester, Second/ or Pregnancy, Unplanned/ or Pregnancy, High-Risk/ or Pregnancy Outcome/ and qualitative.mp. / or Qualitative Research/ |
| **Maternity & Infant Care Database (MIDIRS) 1971 to Feb, 2006**  *floods/ or flood.mp. [mp=abstract, subject heading word, title] or exp *Disasters and pregnancy.mp. [mp=abstract, subject heading word, title] and qualitative.mp. or qualitative research [mp=abstract, subject heading word, title] |
| **PsycINFO (APA) 1806 to Feb 2026**  flood*.ab or flooding or floods.af or flood.mp flood*.mp. or Floods exp or *Floods or Flood.mp. or exp *Disasters/ and pregnan*.mp. or Pregnancy Trimester, First, Second, Third/ or Pregnancy Complications/ or Pregnancy in Adolescence/ or Pregnancy Prolonged/ or Pregnancy Complications, Infectious/ or Pregnancy Outcome/ or Pregnancy, High-Risk/ or Pregnancy, Unplanned/ preg*.ab or pregnan* or exp Pregnancy/ or exp Adolescent Pregnancy/ or pregnant.mp and qualitative.mp. or Qualitative Research/ or qualitative exp Qualitative Measures/ or qualitative.mp. or exp Qualitative Methods/ |
| **Scopus**  TITLE-ABS-KEY (flood OR floods OR flooding OR rain OR "tidal waves" OR deluge OR "flash flood" OR "flood plain" OR "seasonal flood" OR "flood event" ) AND ( "pregnancy Trimester First" OR "Pregnancy Trimesters" OR pregnancy/ OR "Pregnancy Trimester Third" OR pregnancy.mp. OR "Pregnancy Trimester Second" OR "first 1000 days" OR "maternal health services" OR "maternal-child health services" OR "perinatal care" OR "prenatal care" OR "pregnancy" OR "labour obstetric" / OR "pregnancy maintenance" OR "antenatal care" ) AND ( "Delivery of Health Care" / OR utili*ation.mp. OR access.mp. OR "Access to Primary Care" OR "Health Services Accessibility" OR "Patient Acceptance of Health Care" / OR "Community Health Services" OR "Primary Health Care" OR "secondary healthcare" AND “qualitative”/OR qualitative research) |
| **Web of Science**  Flood* OR “flood event” OR “floodwaters” OR storms OR “tidal waves”  (Topic) and pregn* (All Fields) and qualitative (All Fields) |
| **Google (to Feb 26) First 10 pages**  Floods, maternal health, qualitative |
| **Undermind (to Feb 26)**  Prompt  “I want to find peer-reviewed journal articles that use qualitative methods to explore the impacts of any type of flooding event on women who were pregnant at the time of the flood or are postpartum women reflecting on a pregnancy during which flooding occurred, in any geographic or sociocultural context” |

**Online Resource 2: GRADE CERQual Assessment**

| **Line of Argument** | **Contributing Studies** | **Methodological Limitations** | **Coherence** | **Adequacy** | **Relevance** |
| --- | --- | --- | --- | --- | --- |
| **The competing temporality of flooding and pregnancy** | Badakhsh 2010  Hilfinger-Messias 2007  Jeffers 2022  Maheen 2017  Safajou 2023  Samakya 2024  Sato 2016  Saulnier 2020  Silva-Suarez 2021  Suzuki 2024 | Minor concerns.  Four of nine contributing studies (Sato, Hilfinger-Messias, Maheen, and Safajou) did not report a named theoretical or analytical framework, relying on descriptive or inductive approaches. | No concerns.  All nine contributing studies provided coherent evidence of the dual temporal disruption imposed by flood and pregnancy occurring simultaneously. Four high-contribution studies (Badakhsh, Silva-Suarez, Sato, Suzuki) generated strong second-order interpretations of identity oscillation. Refutational translations were analytically consistent with the argument rather than contradictory to it, illustrating the same mechanism from opposite directions. | Minor concerns.  The theoretical weight of this line of argument rested primarily on the four high-contribution studies. Five contributing studies (Hilfinger-Messias, Jeffers, Maheen, Safajou, Samakya) contributed first-order supporting evidence rather than second-order constructs specifically addressing temporal disruption. The volume of data was substantial, but the interpretive depth was unevenly distributed. | Minor concerns.  All contributing studies were conducted with women who were pregnant during flood events and were directly relevant to the review question. However, one study (Hilfinger-Messias 2007) included 93 Latino survivors of whom only one was pregnant, and another (Saulnier 2020) recruited community members including men and health workers alongside pregnant women. The experiences of pregnant women remained identifiable within these studies, but the primary research focus was broader. |
| **Final Assessment: High Confidence** | | | | | |
| **The structural amplification of inequity** | Badakhsh 2010  Hilfinger-Messias 2007  Jeffers 2022  Kulkarni 2008  Maheen 2017  Safajou 2023  Samakya 2024  Sato 2016  Saulnier 2020  Suzuki 2024 | Minor concerns.  Four of ten contributing studies (Sato, Hilfinger-Messias, Maheen, and Safajou) did not report a named theoretical or analytical framework. | No concerns.  The contributing studies provided coherent evidence for the structural amplification argument across markedly different contexts. Reciprocal translations established the structural rather than cultural nature of the inequity. Refutational translations from Sato and Suzuki, documented that retained agency in Japan and the Philippines, strengthened rather than undermined coherence. They demonstrated that agency was available where structural conditions permitted it, which is what this line of argument theorised. | No concerns.  The contributing studies provided substantial data addressing structural and gendered dimensions of the flood-pregnancy experience. Saulnier's governance framework generated particularly rich second-order constructs around power dynamics and decision-making. Maheen, Samakya, and Kulkarni provided corroborating first-order evidence across three distinct cultural contexts. The combination of high-contribution theoretical studies and corroborating cross-contextual evidence was considered adequate to sustain this line of argument. | Minor concerns.  Saulnier 2020 recruited broadly across the community, including men, village chiefs, and health workers, rather than focusing exclusively on pregnant women. Similarly, Kulkarni 2008 included service providers alongside evacuees, with only one participant confirmed as pregnant. Hilfinger-Messias 2007 had one pregnant participant among 93 participants. Whilst the structural argument benefited analytically from multi-perspective evidence, women's voices remained identifiable within these studies, the broad participant composition of three contributing studies represented a minor relevance consideration. |
| **Final Assessment: High Confidence** | | | | | |
| **The Vulnerability-Resilience Paradox** | Badakhsh 2010  Hilfinger-Messias 2007  Jeffers 2022  Maheen 2017  Safajou 2023  Samakya 2024  Sato 2016  Saulnier 2020  Silva-Suarez 2021  Suzuki 2024 | Minor concerns.  Four of ten contributing studies (Sato, Hilfinger-Messias, Maheen, and Safajou) did not report a named theoretical or analytical framework. | No concerns.  All contributing studies provided coherent evidence that resilience and vulnerability co-existed within the participants’ lives and their communities simultaneously. The refutational finding from Sato (communal food-sharing documented alongside looting) illustrated this paradox directly: it marked the threshold at which legitimate coping strategies were exhausted, which was the central claim of this line of argument. This finding strengthened rather than disrupted coherence. No contributing study produced evidence that contradicted this paradox. | No concerns.  This was the most data-rich line of argument in the synthesis. All ten contributing studies generated findings relevant to coping, resilience, or the conditions under which coping succeeded or failed. Second-order constructs from Badakhsh, Saulnier, Suzuki, and Sato were theoretically developed and directly addressed the interaction between individual coping and structural conditions for survival. Jeffers and Samakya extended the argument with additional coping dimensions which were not present in the high-contribution studies. | Minor concerns.  All contributing studies involved pregnant women in flood-affected settings, directly relevant to the review question. Saulnier 2020 and Hilfinger-Messias 2007 included broader community participants alongside pregnant women. For this line of argument, the multi-perspective data from Saulnier was particularly informative, mitigating the broader population concern. The experiences of pregnant women remained identifiable throughout. |
| **Final Assessment: High Confidence** | | | | | |
